# Supplementary material
Source: PubMed Central journal article supplement (PMC5069444)
Supplement: ijbsv12p1225s1.pdf [file ijbsv12p1225s1.pdf]

**Supplementary Table 1. The clinical information of 10 patients with cirrhosis**

| <b>Table 1. Characteristics of patients with cirrhosis</b> |                 |     |
|------------------------------------------------------------|-----------------|-----|
| Characteristic                                             | Cohort (n=10)   |     |
|                                                            | No. of Patients | %   |
| Sex                                                        |                 |     |
| Male                                                       | 9               | 90  |
| Female                                                     | 1               | 10  |
| Age, years                                                 |                 |     |
| Median                                                     | 55              |     |
| Range                                                      | 37-76           |     |
| ALT, IU/L                                                  |                 |     |
| Median                                                     | 48.35           |     |
| Range                                                      | 16-153.6        |     |
| AST, IU/L                                                  |                 |     |
| Median                                                     | 65.5            |     |
| Range                                                      | 17.1-219        |     |
| STB, $\mu$ mol/L                                           |                 |     |
| Median                                                     | 39.05           |     |
| Range                                                      | 13.5-255.9      |     |
| CB, $\mu$ mol/L                                            |                 |     |
| Median                                                     | 17              |     |
| Range                                                      | 3.3-139.5       |     |
| CT, Cirrhosis                                              |                 |     |
| YES                                                        | 10              | 100 |
| NO                                                         | 0               | 0   |
| HBsAg                                                      |                 |     |
| Positive                                                   | 5               | 50  |
| Negative                                                   | 5               | 50  |

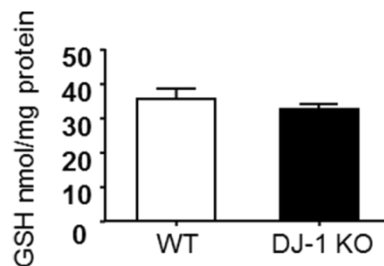

**Figure S1. GSH has no difference between WT and DJ-1 KO mice in the acute liver injury.** GSH content in liver tissue homogenates was evaluated between WT mice and DJ-1 KO mice 36h post CCl<sub>4</sub> injection. The data are shown as the mean  $\pm$  SEM.

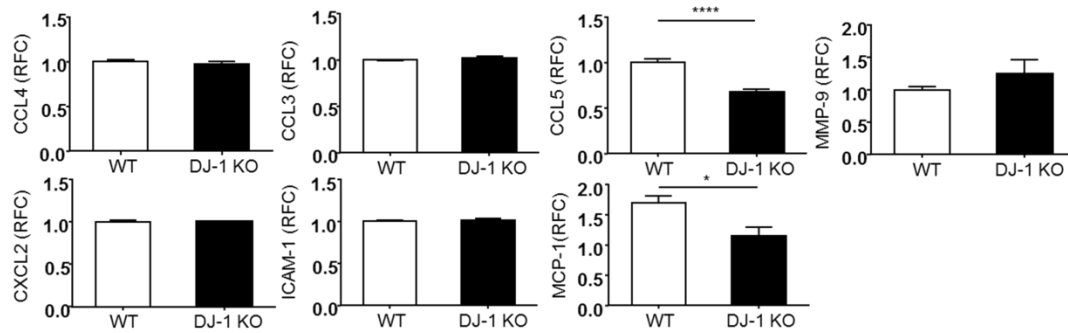

**Figure S2.** The expression of fibrosis-related gene MMP-9 and inflammatory cells infiltration-related genes CCL4, CCL3, CXCL2, ICAM-1, CCL5, MCP-1 in WT mice and DJ-1 KO mice was analyzed by qPCR after CCl<sub>4</sub> treatment for 8 weeks (n=8-10).

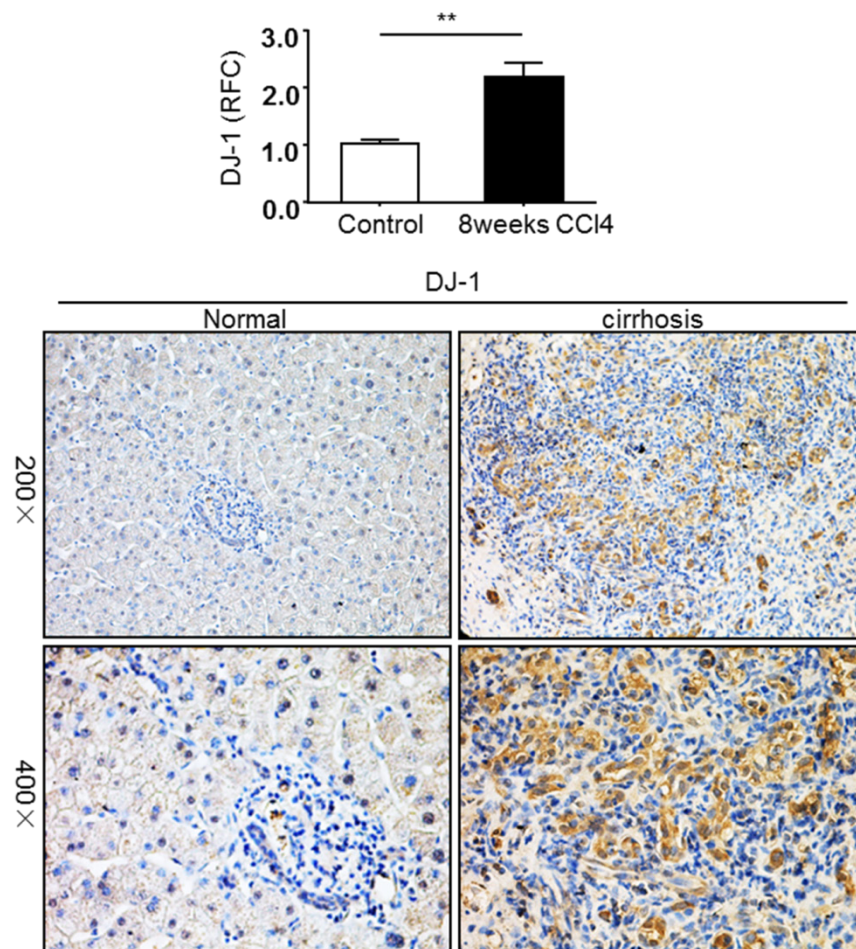

**Figure S3.** DJ-1 expression is upregulated in CCl<sub>4</sub>-induced mouse liver fibrosis model and cirrhosis patients. (A) DJ-1 mRNA levels in C57BL/6 background mice were analyzed by qPCR after CCl<sub>4</sub> treatment for 8 weeks (n = 4-6). The data are shown as the mean  $\pm$  SEM. \*\*P<0.01, RFC: relative fold change. (B) Representative areas with DJ-1 immunohistochemistry in liver sections of normal and cirrhosis patients (200 $\times$  magnification and 400 $\times$  magnification).

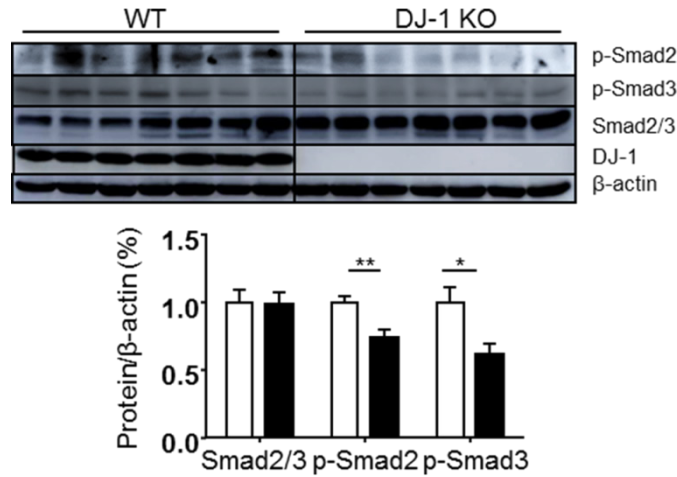

Figure S4. Phosphorylation levels of Smad2 and Smad3 in liver tissues from WT mice and DJ-1 KO mice treated with CCl<sub>4</sub> for 8 weeks were analyzed by immunoblotting. Bar graph shows quantification of it (n = 7). \*P<0.05, \*\*P<0.01.

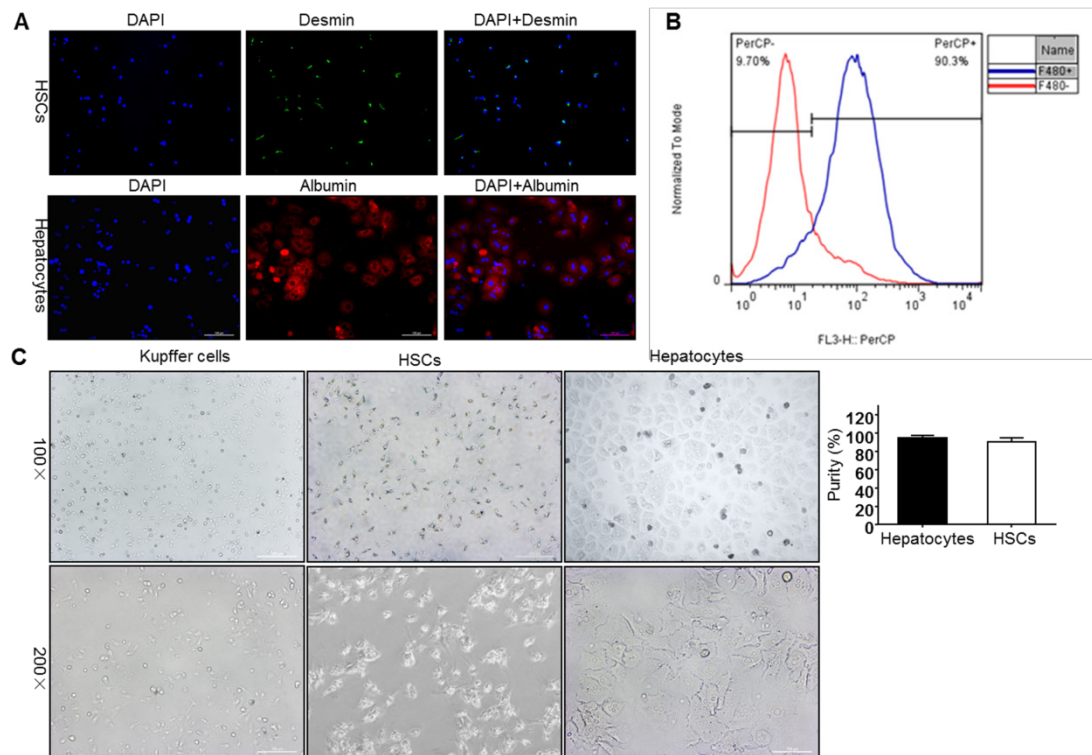

**Figure S5. The purities of the primary cells were identified.** (A) The purities of the primary hepatocytes and HSCs were identified by albumin and desmin staining respectively and (B) the purity of Kupffer cells was identified by F4/80 staining followed with flow cytometry. (C) The images of cell morphology of Kupffer cells, hepatocytes and HSCs were provided and the purities of hepatocytes and HSCs were calculated by dividing albumin or desmin positive cells to DAPI.
